# Supplementary material for: miR-489 inhibits silica-induced pulmonary fibrosis by targeting MyD88 and Smad3 and is negatively regulated by lncRNA CHRF
Source: PubMed Central journal article supplement (PMC4978961; doi:10.1038/srep30921), 2016-08-10
Supplement: srep30921-s1.pdf [file srep30921-s1.pdf]

**miR-489 inhibits silica-induced pulmonary fibrosis by targeting  
MyD88 and Smad3 and is negatively regulated by lncRNA CHRF**

Qiuyun Wu<sup>1,†</sup>, Lei Han<sup>1,2,†</sup>, Weiwen Yan<sup>1,†</sup>, Xiaoming Ji<sup>1</sup>, Ruhui Han<sup>1</sup>, Jingjin Yang<sup>1</sup>,  
Jiali Yuan<sup>1</sup>, Chunhui Ni<sup>1,\*</sup>

<sup>1</sup> Department of Occupational Medicine and Environmental Health, Key Laboratory of Modern Toxicology of Ministry of Education, School of Public Health, Nanjing Medical University, Nanjing, China.

<sup>2</sup> Institute of Occupational Disease Prevention, Jiangsu Provincial Center for Disease Control and Prevention, Nanjing, China.

<sup>†</sup>These authors contributed equally to this work.

\* Corresponding authors

\* Correspondence to: Department of Occupational Medicine and Environmental Health, Key Laboratory of Modern Toxicology of Ministry of Education, School of Public Health, Nanjing Medical University, Nanjing 211166, China. Tel: +86 25 86868418; Fax: +86 25 86868499; Email: chni@njmu.edu.cn, chninjmu@126.com

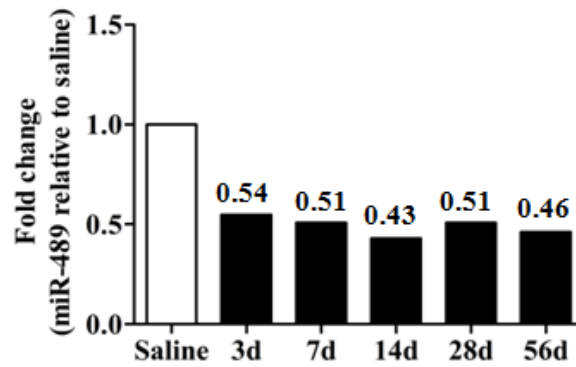

**Figure S1. miR-489 is decreased in mouse lung tissues in a model of silica-induced pulmonary fibrosis.** The C57BL/6 mice were sacrificed on day 3, 7, 14, 28 or 56 after intratracheal instillation of silica suspended saline and saline. The fold changes of miR-489 in mouse lung tissues were determined by microRNA (miRNA, miR) microarray with total RNA analysis.

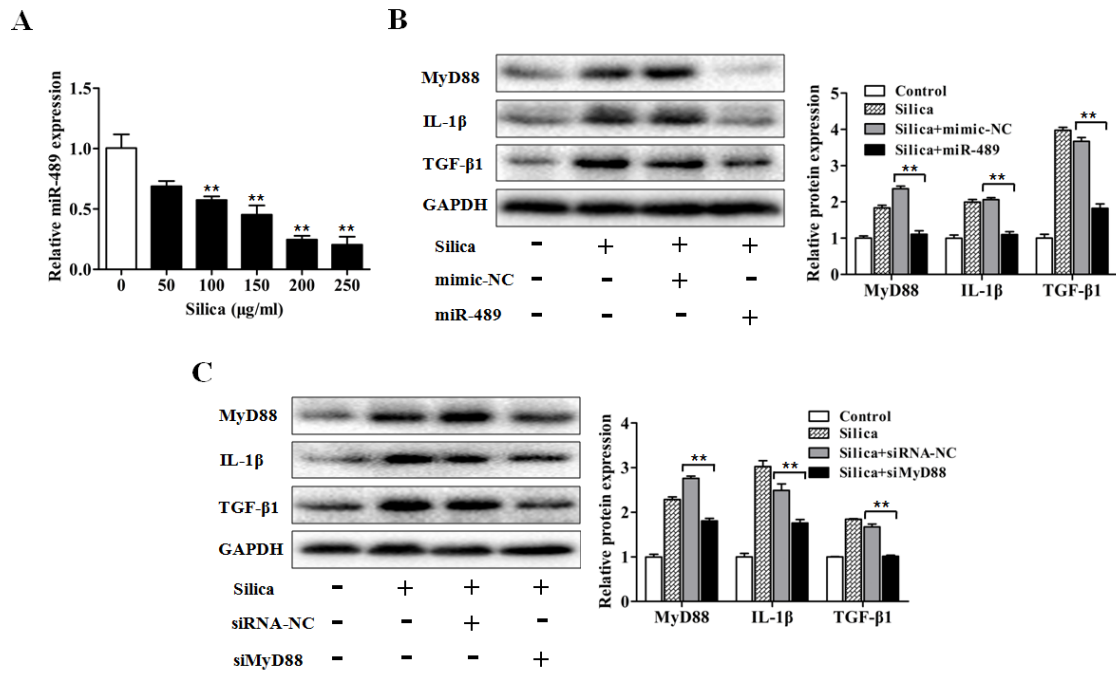

**Figure S2. miR-489 suppresses inflammation by targeting MyD88 in differentiated THP-1 cells.** (A) qRT-PCR analysis of miR-489 levels in differentiated THP-1 cells treated with different doses of silica for 12 h with  $**P < 0.01$  vs. the dose 0 group. (B) Western blot analysis of MyD88, IL-1 $\beta$  and TGF- $\beta$ 1 expression in differentiated THP-1 cells transfected with miR-489 mimic with  $**P < 0.01$  vs. the silica plus mimic-NC group. (C) Western blot analysis of MyD88, IL-1 $\beta$  and TGF- $\beta$ 1 expression in differentiated THP-1 cells transfected with siRNA against MyD88 for 24 h with  $**P < 0.01$  vs. the silica plus siRNA-NC group. All data are expressed as the means  $\pm$ SD of at least three independent experiments.

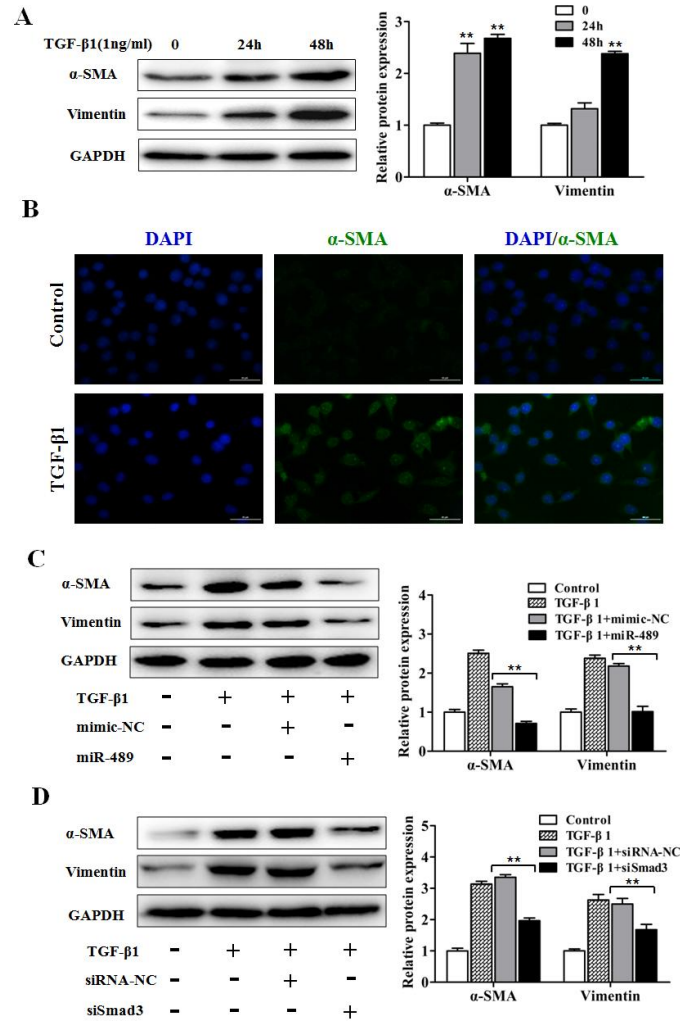

**Figure S3. miR-489 suppresses fibrotic biomarkers by targeting Smad3. (A)**

Western blot analysis of  $\alpha$ -SMA and Vimentin expression in NIH/3T3 cells treated with 1 ng/ml TGF- $\beta$ 1 for 24 and 48 h with  $**P < 0.01$  vs. the control group. **(B)**

Immunofluorescence images of  $\alpha$ -SMA expression in NIH/3T3 cells treated with 1 ng/ml TGF- $\beta$ 1 for 48 h. **(C)** Western blot analysis of  $\alpha$ -SMA and Vimentin expression

in NIH/3T3 cells transfected with miR-489 mimic with  $**P < 0.01$  vs. the TGF- $\beta$ 1 plus mimic-NC group. **(D)** Western blot analysis of  $\alpha$ -SMA and Vimentin expression in

NIH/3T3 cells transfected with siRNA against Smad3 for 24 h with  $**P < 0.01$  vs. the TGF- $\beta$ 1 plus siRNA-NC group. All data are expressed as the means  $\pm$  SD of at least

three independent experiments.

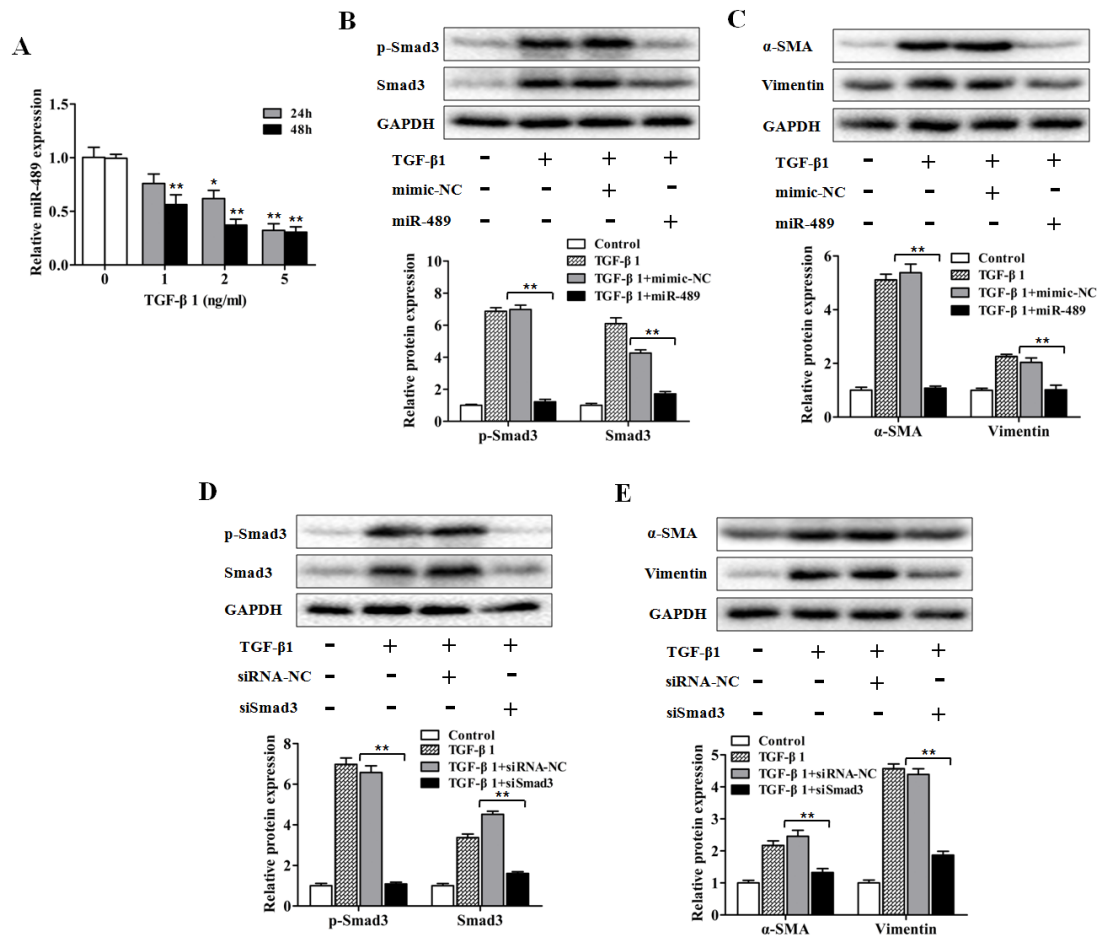

**Figure S4. miR-489 suppresses fibroblast differentiation by targeting Smad3 in human fibroblasts (MRC-5).** (A) qRT-PCR analysis of miR-489 levels in human fibroblasts (MRC-5) treated with different doses of TGF-β1 for 24 and 48 h with  $*P < 0.05$  and  $**P < 0.01$  vs. the dose 0 group. (B-C) Western blot analysis of total Smad3, p-Smad3, α-SMA and Vimentin expression in MRC-5 cells transfected with miR-489 mimic with  $**P < 0.01$  vs. the TGF-β1 plus mimic-NC group. (D-E) Western blot analysis of total Smad3, p-Smad3, α-SMA and Vimentin expression in MRC-5 cells transfected with siRNA against Smad3 for 24 h with  $**P < 0.01$  vs. the TGF-β1 plus siRNA-NC group. All data are expressed as the means  $\pm$  SD of at least three independent experiments.

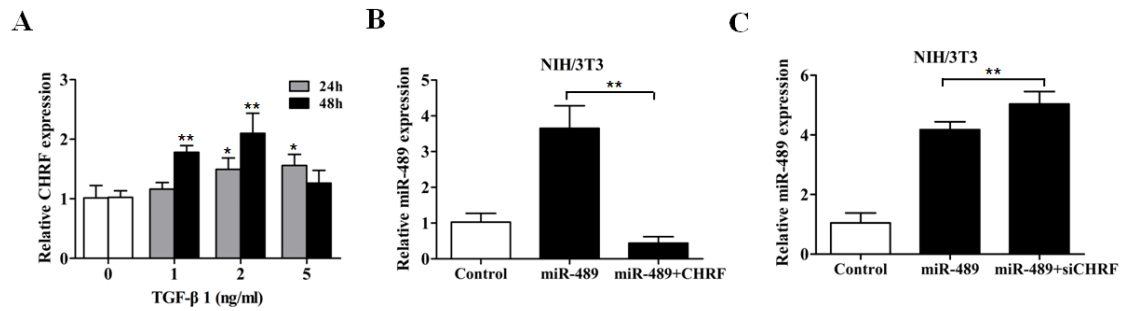

**Figure S5. The lncRNA CHRF negatively regulates miR-489 expression in fibroblasts.** (A) qRT-PCR analysis of CHRF levels in NIH/3T3 cells treated with different doses of TGF-β1 for 24 and 48 h with  $*P < 0.05$  and  $**P < 0.01$  vs. the dose 0 group. (B) qRT-PCR analysis of miR-489 levels in NIH/3T3 cells transfected with miR-489 mimic or co-transfected with miR-489 mimic and pUC57 plasmids of CHRF with  $**P < 0.01$  vs. the miR-489 mimic group. (C) qRT-PCR analysis of miR-489 levels in NIH/3T3 cells transfected with miR-489 mimic or co-transfected with miR-489 mimic and siRNA against CHRF with  $**P < 0.01$  vs. the miR-489 mimic group. All data are expressed as the means  $\pm$  SD of at least three independent experiments.

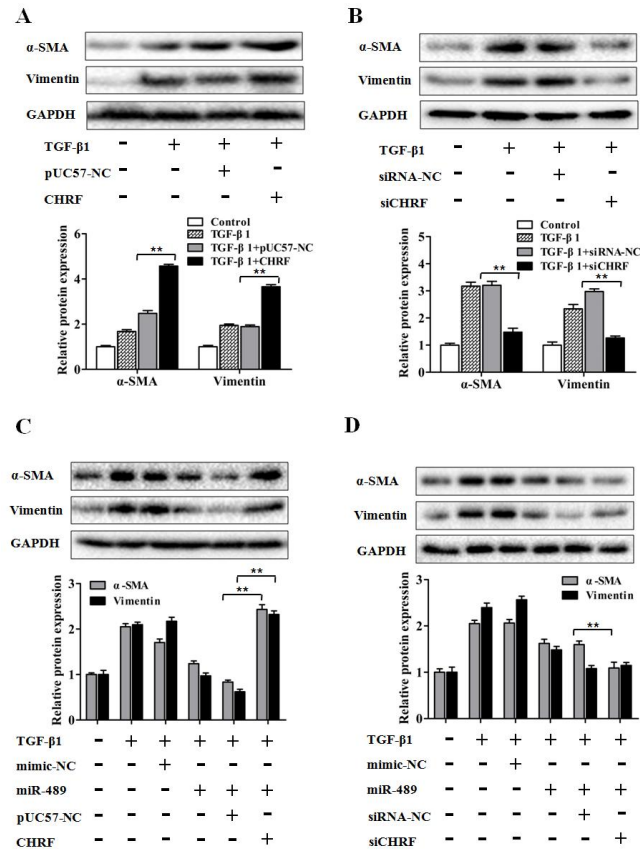

**Figure S6. The lncRNA CHRF promotes silica-induced elevation of fibrotic biomarkers through targeting miR-489.** (A) Western blot analysis of  $\alpha$ -SMA and Vimentin expression in NIH/3T3 cells transfected with pUC57 plasmids of CHRF with  $**P < 0.01$  vs. the TGF- $\beta$ 1 plus pUC57-NC group. (B) Western blot analysis of  $\alpha$ -SMA and Vimentin expression in NIH/3T3 cells transfected with siRNA against CHRF with  $**P < 0.01$  vs. the TGF- $\beta$ 1 plus siRNA-NC group. (C) Western blot analysis of  $\alpha$ -SMA and Vimentin expression in NIH/3T3 cells co-transfected with miR-489 mimic and CHRF plasmids with  $**P < 0.01$  vs. the TGF- $\beta$ 1 plus miR-489 mimic and pUC57-NC group. (D) Western blot analysis of  $\alpha$ -SMA and Vimentin expression in NIH/3T3 cells co-transfected with miR-489 mimic and siRNA against CHRF with  $**P < 0.01$  vs. the TGF- $\beta$ 1 plus miR-489 mimic and siRNA-NC group. All data are expressed as the means  $\pm$  SD of at least three independent experiments.
